# Supplementary material for: Research trends in farmers’ mental health: A scoping review of mental health outcomes and interventions among farming populations worldwide
Source: PubMed Central journal article supplement (PMC6894791; doi:10.1371/journal.pone.0225661), 2019-12-05
Supplement: pone.0225661.s001.pdf [file pone.0225661.s001.pdf]

headers\_table\_report(2)

| Question Text                                                  | Type | Question Header                                                | Question Validation | Answer Text                     | Answer Header                   | Answer Validation |
|----------------------------------------------------------------|------|----------------------------------------------------------------|---------------------|---------------------------------|---------------------------------|-------------------|
| Is the text available in English?                              |      | Is the text available in English?                              |                     | Yes                             | Yes                             |                   |
|                                                                |      |                                                                |                     | No                              | No                              |                   |
| Based on the title and abstract, is the article relevant?      |      | Based on the title and abstract, is the article relevant?      |                     | Yes                             | Yes                             |                   |
|                                                                |      |                                                                |                     | No                              | No                              |                   |
| What year was the study conducted?                             |      | What year was the study conducted?                             |                     |                                 |                                 |                   |
| What year was the study published?                             |      | What year was the study published?                             |                     |                                 |                                 |                   |
| What was the source of the study?                              |      | What was the source of the study?                              |                     | Journal                         | Journal                         |                   |
|                                                                |      |                                                                |                     | Conference Proceedings/Abstract | Conference Proceedings/Abstract |                   |
|                                                                |      |                                                                |                     | Government Report               | Government Report               |                   |
|                                                                |      |                                                                |                     | Website                         | Website                         |                   |
|                                                                |      |                                                                |                     | Thesis                          | Thesis                          |                   |
|                                                                |      |                                                                |                     | Editorial                       | Editorial                       |                   |
|                                                                |      |                                                                |                     | Textbook                        | Textbook                        |                   |
|                                                                |      |                                                                |                     | Other                           | Other                           |                   |
| Which country/countries was the study conducted in?            |      | Which country/countries was the study conducted in?            |                     | Country/Countries               | Country/Countries               |                   |
|                                                                |      |                                                                |                     | If Canada, Which province       | If Canada, Which province       |                   |
| Was this article:                                              |      | Was this article:                                              |                     | Primary research                | Primary research                |                   |
|                                                                |      |                                                                |                     | Review article                  | Review article                  |                   |
|                                                                |      |                                                                |                     | Editorial                       | Editorial                       |                   |
|                                                                |      |                                                                |                     | Secondary research              | Secondary research              |                   |
| If secondary research, was it:                                 |      | If secondary research, was it:                                 |                     | Quantitative                    | Quantitative                    |                   |
|                                                                |      |                                                                |                     | Qualitative                     | Qualitative                     |                   |
|                                                                |      |                                                                |                     | Mixed Methods                   | Mixed Methods                   |                   |
| If primary research, was it:                                   |      | If primary research, was it:                                   |                     | Mixed methods                   | Mixed methods                   |                   |
|                                                                |      |                                                                |                     | Quantitative                    | Quantitative                    |                   |
|                                                                |      |                                                                |                     | Qualitative                     | Qualitative                     |                   |
| If quantitative (or mixed methods), was it:                    |      | If quantitative (or mixed methods), was it:                    |                     | Observational                   | Observational                   |                   |
|                                                                |      |                                                                |                     | Experimental                    | Experimental                    |                   |
|                                                                |      |                                                                |                     | Both                            | Both                            |                   |
| If quantitative (or mixed methods), what was the study design? |      | If quantitative (or mixed methods), what was the study design? |                     | Cross-sectional                 | Cross-sectional                 |                   |
|                                                                |      |                                                                |                     | Cohort                          | Cohort                          |                   |
|                                                                |      |                                                                |                     | Case-control                    | Case-control                    |                   |
|                                                                |      |                                                                |                     | RCT                             | RCT                             |                   |

|                                                                         |                                                                  |                                                   |                                                   |
|-------------------------------------------------------------------------|------------------------------------------------------------------|---------------------------------------------------|---------------------------------------------------|
| <b>If observational, was it:</b>                                        | If observational, was it:                                        | Descriptive                                       | Descriptive                                       |
|                                                                         |                                                                  | Hypothesis testing                                | Hypothesis testing                                |
|                                                                         |                                                                  | Both                                              | Both                                              |
| <b>If descriptive (or both), was it:</b>                                | If descriptive (or both), was it:                                | Evaluative: attitudes, stigma, etc                | Evaluative: attitudes, stigma, etc                |
|                                                                         |                                                                  | Estimating an outcome                             | Estimating an outcome                             |
|                                                                         |                                                                  | Development/modification of a diagnostic criteria | Development/modification of a diagnostic criteria |
| <b>if it was hypothesis testing, (or both) was it:</b>                  | if it was hypothesis testing, (or both) was it:                  | Evaluative an intervention                        | Evaluative an intervention                        |
|                                                                         |                                                                  | Identifying risk factors                          | Identifying risk factors                          |
|                                                                         |                                                                  | Evaluation/validation of diagnostic criteria      | Evaluation/validation of diagnostic criteria      |
| <b>If it was experimental/intervention, was it:</b>                     | If it was experimental/intervention, was it:                     | Drugs                                             | Drugs                                             |
|                                                                         |                                                                  | Behaviour modification                            | Behaviour modification                            |
|                                                                         |                                                                  | Psychotherapy                                     | Psychotherapy                                     |
|                                                                         |                                                                  | Health measures                                   | Health measures                                   |
|                                                                         |                                                                  | Other                                             | Other                                             |
| <b>If qualitative (or mixed methods), was it:</b>                       | If qualitative (or mixed methods), was it:                       | Phenomenology                                     | Phenomenology                                     |
|                                                                         |                                                                  | Grounded theory                                   | Grounded theory                                   |
|                                                                         |                                                                  | Ethnographic                                      | Ethnographic                                      |
|                                                                         |                                                                  | Case study                                        | Case study                                        |
|                                                                         |                                                                  | Biography                                         | Biography                                         |
|                                                                         |                                                                  | Other                                             | Other                                             |
| <b>Does the study describe a mental health service?</b>                 | Does the study describe a mental health service?                 | No                                                | No                                                |
|                                                                         |                                                                  | Yes                                               | Yes                                               |
| <b>Who was included in the study population (check all that apply)?</b> | Who was included in the study population (check all that apply)? | Animal farmers                                    | Animal farmers                                    |
|                                                                         |                                                                  | Plant agriculture farmers                         | Plant agriculture farmers                         |
|                                                                         |                                                                  | Permanent farm workers                            | Permanent farm workers                            |
|                                                                         |                                                                  | Migrant farm workers                              | Migrant farm workers                              |
|                                                                         |                                                                  | Farm families                                     | Farm families                                     |
|                                                                         |                                                                  | Not specified                                     | Not specified                                     |
|                                                                         |                                                                  | Other:                                            | Other:                                            |
| <b>If animal farmers, which commodity (check all that apply):</b>       | If animal farmers, which commodity (check all that apply):       | Swine                                             | Swine                                             |
|                                                                         |                                                                  | Beef                                              | Beef                                              |
|                                                                         |                                                                  | Dairy cattle                                      | Dairy cattle                                      |
|                                                                         |                                                                  | Small ruminants: meat or dairy                    | Small ruminants: meat or dairy                    |
|                                                                         |                                                                  | Poultry                                           | Poultry                                           |
|                                                                         |                                                                  | Aquaculture                                       | Aquaculture                                       |
|                                                                         |                                                                  | Other                                             | Other                                             |
| <b>If plant agriculture, which commodity (check all that apply):</b>    | If plant agriculture, which commodity (check all that apply):    | Crops                                             | Crops                                             |
|                                                                         |                                                                  | Horticulture                                      | Horticulture                                      |
| <b>What outcome(s) were measured (check all that apply):</b>            | What outcome(s) were measured (check all that apply):            | Suicide/suicide ideation/suicide attempt          | Suicide/suicide ideation/suicide attempt          |

|                                                                           |                                                                    |  |                                   |                                   |  |
|---------------------------------------------------------------------------|--------------------------------------------------------------------|--|-----------------------------------|-----------------------------------|--|
|                                                                           |                                                                    |  | Depression                        | Depression                        |  |
|                                                                           |                                                                    |  | Anxiety                           | Anxiety                           |  |
|                                                                           |                                                                    |  | Stress/stressors                  | Stress/stressors                  |  |
|                                                                           |                                                                    |  | Mortality                         | Mortality                         |  |
|                                                                           |                                                                    |  | Burnout                           | Burnout                           |  |
|                                                                           |                                                                    |  | Resilience                        | Resilience                        |  |
|                                                                           |                                                                    |  | Not specified                     | Not specified                     |  |
|                                                                           |                                                                    |  | Other                             | Other                             |  |
| <b>What year did the service become available?</b>                        | What year did the service become available?                        |  |                                   |                                   |  |
| <b>Is the service still available?</b>                                    | Is the service still available?                                    |  | Yes                               | Yes                               |  |
|                                                                           |                                                                    |  | No                                | No                                |  |
| <b>If the service is no longer available, why (check all that apply)?</b> | If the service is no longer available, why (check all that apply)? |  | Funding                           | Funding                           |  |
|                                                                           |                                                                    |  | Lack of use                       | Lack of use                       |  |
|                                                                           |                                                                    |  | Other resource issue              | Other resource issue              |  |
|                                                                           |                                                                    |  | Not stated                        | Not stated                        |  |
|                                                                           |                                                                    |  | Other                             | Other                             |  |
| <b>Is the service informational or interventional?</b>                    | Is the service informational or interventional?                    |  | Informational                     | Informational                     |  |
|                                                                           |                                                                    |  | Interventional                    | Interventional                    |  |
|                                                                           |                                                                    |  | Both information and intervention | Both information and intervention |  |
|                                                                           |                                                                    |  | Other                             | Other                             |  |
| <b>If informational, how was it delivered?</b>                            | If informational, how was it delivered?                            |  | Website                           | Website                           |  |
|                                                                           |                                                                    |  | Emailed directly to user          | Emailed directly to user          |  |
|                                                                           |                                                                    |  | Mail                              | Mail                              |  |
|                                                                           |                                                                    |  | In person                         | In person                         |  |
|                                                                           |                                                                    |  | Other                             | Other                             |  |
|                                                                           |                                                                    |  | Not Specified                     | Not Specified                     |  |
| <b>How was the intervention delivered (check all that apply):</b>         | How was the intervention delivered (check all that apply):         |  | In person                         | In person                         |  |
|                                                                           |                                                                    |  | Online                            | Online                            |  |
|                                                                           |                                                                    |  | Telephone                         | Telephone                         |  |
|                                                                           |                                                                    |  | Other                             | Other                             |  |
| <b>Who developed the service (check all that apply):</b>                  | Who developed the service (check all that apply):                  |  | Government                        | Government                        |  |
|                                                                           |                                                                    |  | Physicians                        | Physicians                        |  |
|                                                                           |                                                                    |  | Community members                 | Community members                 |  |
|                                                                           |                                                                    |  | Farmers                           | Farmers                           |  |
|                                                                           |                                                                    |  | Non-profit/NGO                    | Non-profit/NGO                    |  |
|                                                                           |                                                                    |  | Industry                          | Industry                          |  |
|                                                                           |                                                                    |  | Other                             | Other                             |  |
| <b>If a governmental agency, was it (check all that apply):</b>           | If a governmental agency, was it (check all that apply):           |  | Local/municipal                   | Local/municipal                   |  |
|                                                                           |                                                                    |  | Provincial/state                  | Provincial/state                  |  |
|                                                                           |                                                                    |  | National                          | National                          |  |

|                                                                 |                                                          |                   |                   |
|-----------------------------------------------------------------|----------------------------------------------------------|-------------------|-------------------|
| <b>Who delivered the service (check all that apply):</b>        | Who delivered the service (check all that apply):        | Government        | Government        |
|                                                                 |                                                          | Physicians        | Physicians        |
|                                                                 |                                                          | Community members | Community members |
|                                                                 |                                                          | Farmers           | Farmers           |
|                                                                 |                                                          | Non-profit/NGO    | Non-profit/NGO    |
|                                                                 |                                                          | Industry          | Industry          |
|                                                                 |                                                          | Other             | Other             |
| <b>If a governmental agency, was it (check all that apply):</b> | If a governmental agency, was it (check all that apply): | Local/municipal   | Local/municipal   |
|                                                                 |                                                          | Provincial/state  | Provincial/state  |
|                                                                 |                                                          | National          | National          |
| <b>Who funds the service (check all that apply)?</b>            | Who funds the service (check all that apply)?            | Government        | Government        |
|                                                                 |                                                          | Private: specify  | Private: specify  |
|                                                                 |                                                          | Industry          | Industry          |
|                                                                 |                                                          | Non-profit/NGO    | Non-profit/NGO    |
|                                                                 |                                                          | Other             | Other             |
| <b>If a governmental agency, was it (check all that apply):</b> | If a governmental agency, was it (check all that apply): | Local/municipal   | Local/municipal   |
|                                                                 |                                                          | Provincial/state  | Provincial/state  |
|                                                                 |                                                          | National          | National          |
| <b>Is the service permanent?</b>                                | Is the service permanent?                                | Yes               | Yes               |
|                                                                 |                                                          | No                | No                |
|                                                                 |                                                          | Other             | Other             |
| <b>Has the service been evaluated?</b>                          | Has the service been evaluated?                          | Yes               | Yes               |
|                                                                 |                                                          | No                | No                |
